# Supplementary material
Source: PubMed Central journal article supplement (PMC4287240)
Supplement: NIHMS345292-supplement-01.pdf [file NIHMS345292-supplement-01.pdf]

## Suppl. Figure 1

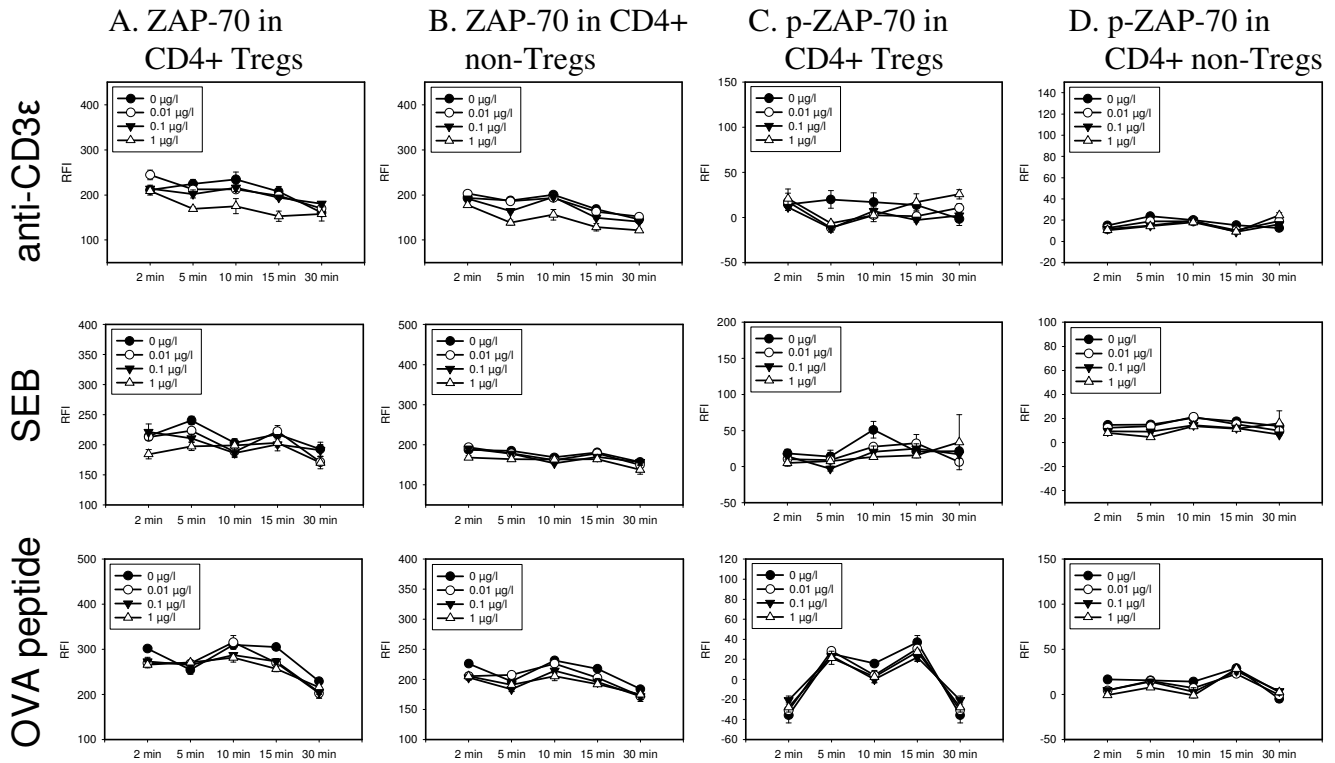

**Early expression and phosphorylation of ZAP-70 in Tregs and non-Tregs following *in vitro* stimulation with CD3ε mAb, SEB, and OVA.** In analogy to Figure 2, differential expression of the intracellular signaling molecule ZAP-70 was assessed in Tregs (column A) and non-Tregs (column B) by flow cytometry and analyzed in a time dependent manner (2 min; 5 min, 10 min, 15 min, and 30 min) following stimulation with CD3ε mAb, SEB, or OVA-peptide. Intracellular phosphorylation of ZAP-70 was assessed using an antibody specific for the phosphorylated epitope, Tyr493, of ZAP-70 in Tregs (column C) and non-Tregs (column D). The relative fluorescence intensity (RFI) for stained intracellular ZAP-70 and p-ZAP-70 in Tregs and non-Tregs is displayed. Of note, different instrumental settings were used, the RFI of this set of data cannot be directly compared to data given in Figure 2. N=5 individual mice per group. Mean  $\pm$  SEM given.
