# Supplementary material
Source: PubMed Central journal article supplement (PMC4287240)
Supplement: NIHMS345292-supplement-02.pdf [file NIHMS345292-supplement-02.pdf]

## Suppl. Figure 2

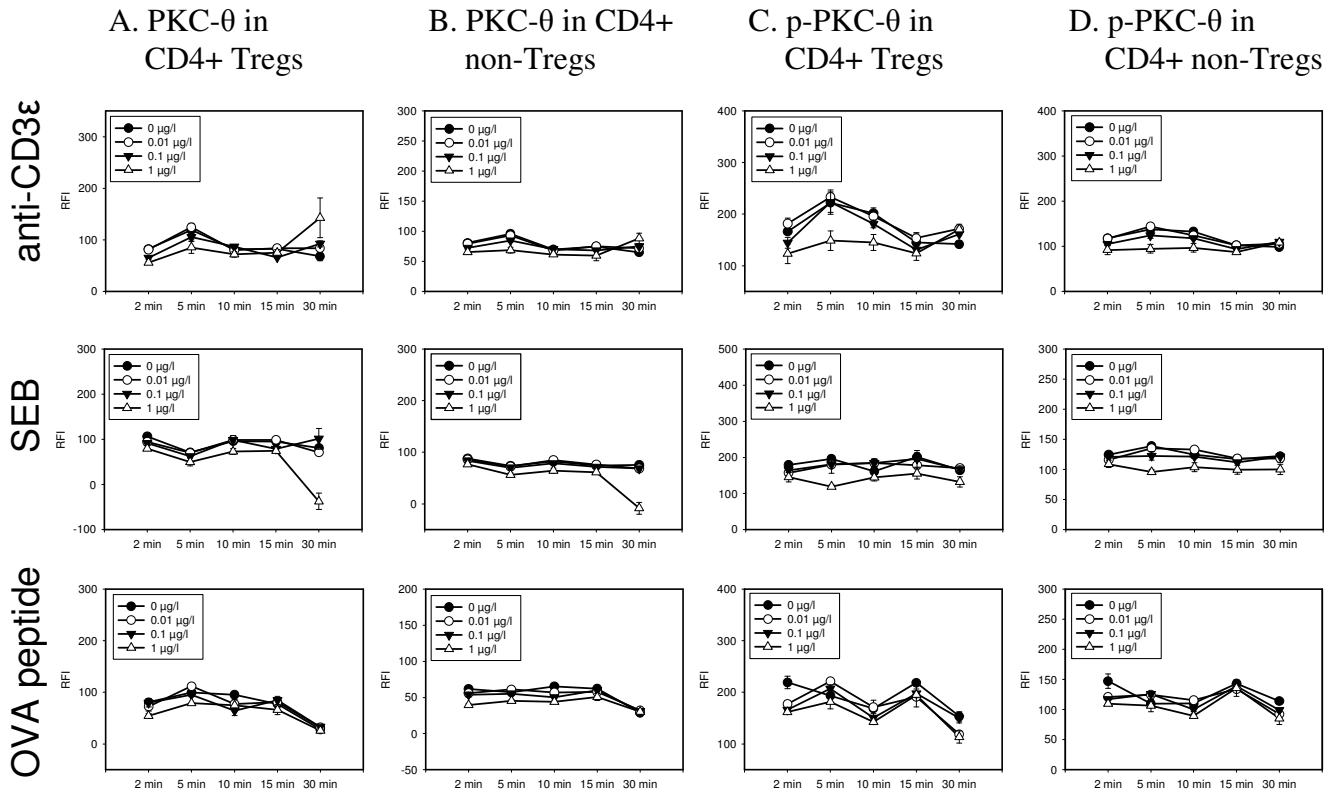

**Early expression and phosphorylation of PKC- $\theta$  in Tregs and non-Tregs following *in vitro* stimulation with CD3  $\epsilon$  mAb, SEB, and OVA.** In analogy to Figure 3, the intracellular expression and phosphorylation of PKC- $\theta$  was assessed in Tregs vs. non-Tregs using phospho-flow cytometry. The stimuli anti-CD3  $\epsilon$  mAb, SEB, and OVA-peptide were added in different doses (0, 0.01, 0.1, or 1  $\mu$ g/ml) to cultures of splenocytes harvested from WT or OT-II transgenic mice. Following incubation times from 2 min to 30 min, the early changes in expression and phosphorylation of the intracellular signaling molecule PKC- $\theta$  was analyzed. The charts represent the quantitative data of the relative fluorescence intensity (RFI) for stained intracellular PKC- $\theta$  and p-PKC- $\theta$  in Tregs and non-Tregs. Of note, different instrumental settings were used, the RFI of this set of data cannot be directly compared to data given in Figure 3. N=5 individual mice per group. Mean  $\pm$  SEM given.
